# Supplementary material for: Pattern Specification and Immune Response Transcriptional Signatures of Pericardial and Subcutaneous Adipose Tissue
Source: PLoS One. 2011 Oct 11;6(10):e26092. doi: 10.1371/journal.pone.0026092 (PMC3191160; doi:10.1371/journal.pone.0026092)
Supplement: Table S4 — Expression of core adipocyte function genes in isolated pericardial adipocytes (pcAds) vs. isolated subcutaneous adipocytes (sqAds). (DOCX) [file pone.0026092.s006.docx]

| | Gene | Description | p-value | q-value | Fold Change (pcAds / sqAds) | | --- | --- | --- | --- | --- | | PLIN1 | Perilipin 1 | 0.88 | 0.98 | 1.03 | | CIDEC | Cell death-inducing DFFA-like effector c | 0.03 | 0.58 | 0.63 | | PPARG | Peroxisome proliferator-activated receptor gamma | 0.08 | 0.64 | 1.49 | | CEBPA | CCAAT/enhancer binding protein, alpha | 0.98 | 1.00 | 1.01 | | CEBPB | CCAAT/enhancer binding protein, beta | 0.22 | 0.75 | 0.75 | | CEBPD | CCAAT/enhancer binding protein, delta | 0.58 | 0.90 | 0.88 | | LPL | Lipoprotein lipase | 0.37 | 0.82 | 1.27 | | LIPE | Hormone-sensitive lipase | 0.02 | 0.57 | 1.74 | | FABP4 | Fatty acid binding protein 4 | 0.01 | 0.55 | 1.91 | | DGAT1 | Diacylglycerol O-acyltransferase 1 | 0.92 | 0.98 | 1.03 | | LEP | Leptin | 0.01 | 0.55 | 1.78 | | CFD | Adipsin | 0.14 | 0.69 | 1.39 | | ADIPOQ | Adiponectin | 0.79 | 0.96 | 1.06 | | UCP1 | Uncoupling protein 1 | 0.18 | 0.72 | -0.50 | |  |  |  |  |
| --- | --- | --- | --- | --- | --- | --- | --- | --- | --- | --- | --- | --- | --- | --- | --- | --- | --- | --- | --- | --- | --- | --- | --- | --- | --- | --- | --- | --- | --- | --- | --- | --- | --- | --- | --- | --- | --- | --- | --- | --- | --- | --- | --- | --- | --- | --- | --- | --- | --- | --- | --- | --- | --- | --- | --- | --- | --- | --- | --- | --- | --- | --- | --- | --- | --- | --- | --- | --- | --- | --- | --- | --- | --- | --- | --- | --- | --- | --- | --- |
